# Supplementary material for: Synthesis, characterization and corrosion inhibition behavior of 2-aminofluorene bis-Schiff bases in circulating cooling water
Source: Royal Society of Chemistry journal article supplement (doi:10.1039/d0ra01903h), 2020-01-01

Supplementary data for

## Synthesis, characterization and corrosion inhibition behavior of 2-aminofluorene bis-Schiff bases in circulating cooling water

Wenchang Wei <sup>a</sup>, Zheng Liu <sup>a,\*</sup>, Chuxin Liang <sup>a</sup>, Guo-Cheng Han <sup>b\*</sup>,

Jiaxing Han <sup>a</sup>, Shufen Zhang <sup>a,c</sup>

<sup>a</sup>College of Chemical and Biological Engineering, Guilin University of Technology, Guangxi Key Laboratory of Electrochemical and Magneto-chemical Functional Materials, Guilin 541004;

<sup>b</sup>School of Life and Environmental Sciences, Guilin University of Electronic Technology, Guilin, 541004, P.R. China

<sup>c</sup>Key Laboratory of Fine Chemicals, Dalian University of Technology, Dalian 116024

Fig. S1. FTIR spectra of M1 (a) and M2 (b).

Fig. S2. FTMS of M1 (a) and M2 (b).

Fig. S3. UV-vis spectrum of M1(a), M2(b) and its raw materials.

**Fig. S1.**

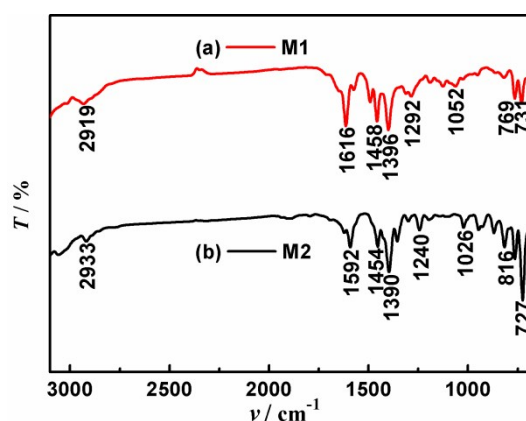

\* Corresponding author. E-mail address: [lisa4.6@163.com](mailto:lisa4.6@163.com) (Z. Liu); [hancg81@guet.edu.cn](mailto:hancg81@guet.edu.cn) (G.-C. Han).

Fig. S2.

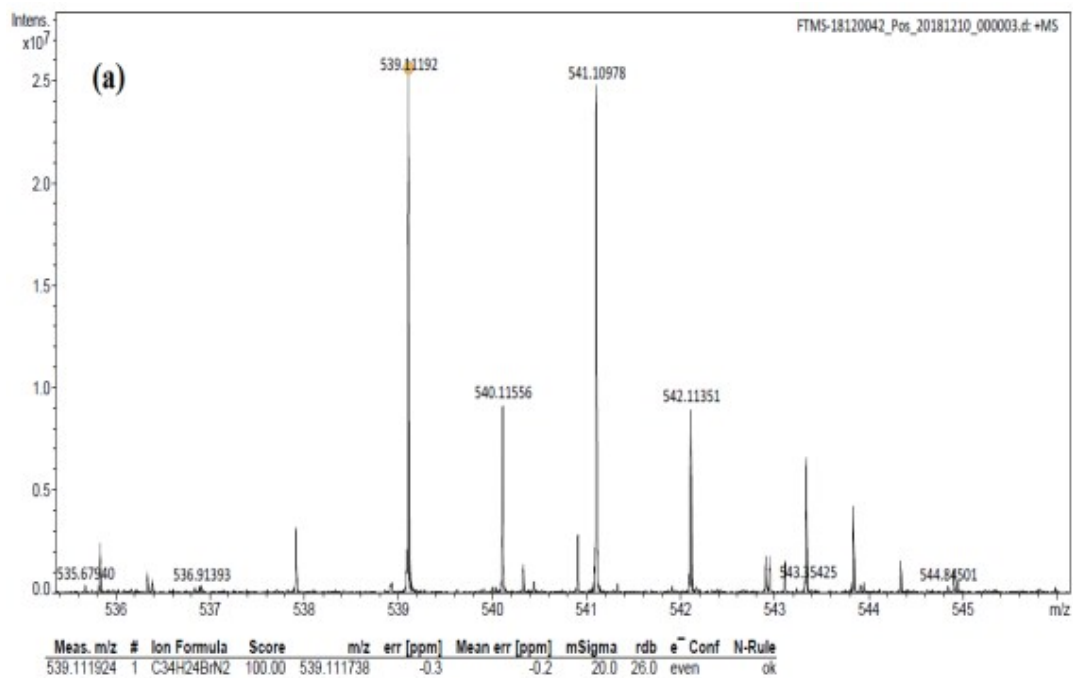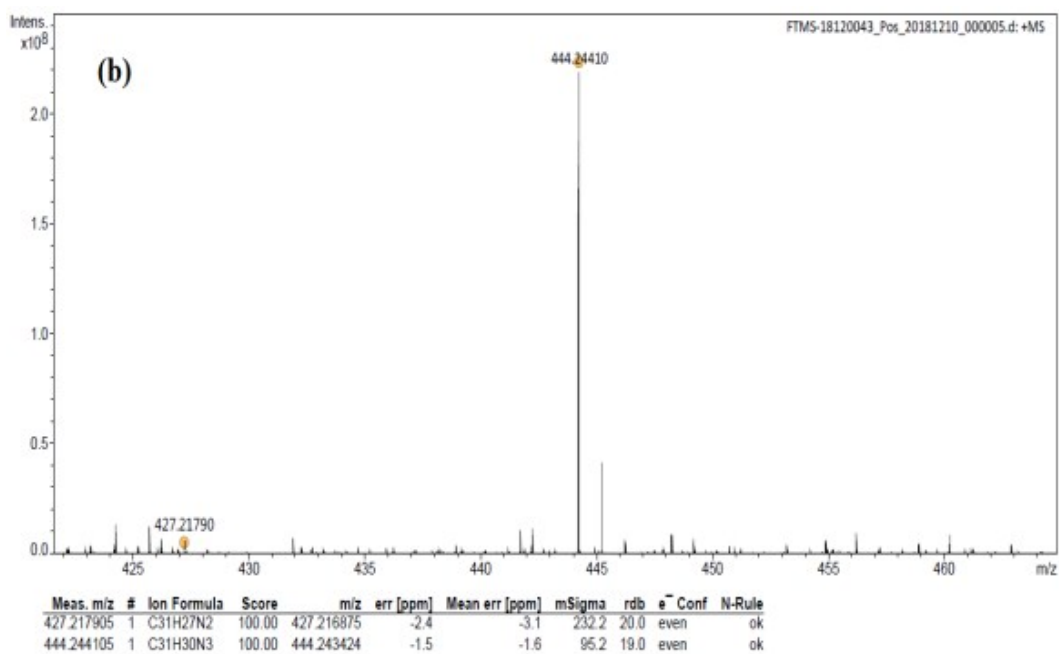

Fig. S3.

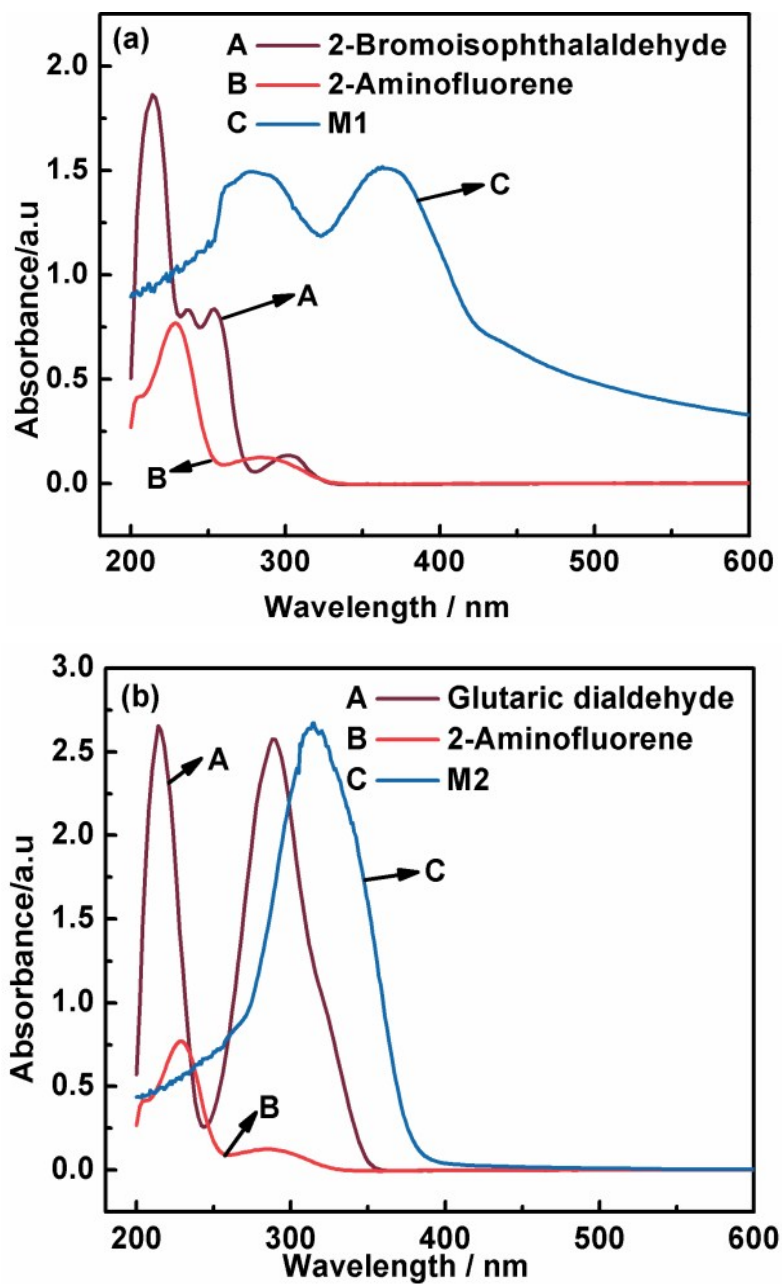

Supplement: d0ra01903h1.pdf [file d0ra01903h1.pdf]
